# Supplementary material for: A MLP-Mixer and mixture of expert model for remaining useful life prediction of lithium-ion batteries
Source: Springer Nature journal article supplement (doi:10.1007/s11704-023-3277-4), 2023-12-16
Supplement: 11704_2023_3277_MOESM1_ESM.pdf [file 11704_2023_3277_MOESM1_ESM.pdf]

# A MLP-Mixer and Mixture of Expert Model for Remaining Useful Life Prediction of Lithium-ion Batteries

Lingling ZHAO, Shitao SONG, Pengyan WANG, Chunyu  
WANG, Junjie WANG, Maozu GUO

Frontiers of Computer Science, DOI: [10.1007/s11704-023-3277-4](https://doi.org/10.1007/s11704-023-3277-4)

# Problems & Ideas

- Problem of predicting the remaining useful life of lithium-ion batteries:
  - Characterization learning of features such as long sequence dependence and mutation in capacity time series helps RUL prediction.
  - Existing approaches to deep learning use the same weights to process data with different levels of contribution, limiting feature extraction capabilities.
- Ideas: Explore models that can effectively handle the different contributions of different time steps in RUL estimation.

| Methods       | NASA         |             |               | CALCE         |               |               |
|---------------|--------------|-------------|---------------|---------------|---------------|---------------|
|               | RE           | MAE         | RMSE          | RE            | MAE           | RMSE          |
| MLP           | 0.3851       | 0.1379      | 0.1541        | 0.4018        | 0.1557        | 0.2038        |
| RNN           | 0.2851       | 0.0749      | 0.0848        | 0.1614        | 0.0938        | 0.1099        |
| LSTM          | 0.2648       | 0.0829      | 0.0905        | 0.0902        | 0.0582        | 0.0736        |
| GRU           | 0.3044       | 0.0806      | 0.0921        | 0.1319        | 0.0671        | 0.0946        |
| Dual-LSTM     | 0.2557       | 0.0815      | 0.0879        | 0.0885        | 0.0636        | 0.0874        |
| DeTransformer | 0.2252       | 0.0713      | 0.0802        | 0.0764        | 0.0613        | 0.0705        |
| MMMe          | <b>0.005</b> | <b>0.04</b> | <b>0.0515</b> | <b>0.0019</b> | <b>0.0229</b> | <b>0.0306</b> |

Plot of experimental results for the public dataset. Left: For the NASA dataset, MMMe achieves RE, MAE, and RMSE of 0.005, 0.04, and 0.0515; Right: For the CALCE dataset, the proposed method reduces RE, MAE, and RMSE scores by at least 97.5%, 60.6%, and 56.6% compared to the second-best method.

# Main Contributions

- Contributions:
  - a novel approach called MMMe for the accurate prediction of the RUL of lithium-ion batteries , providing more reliable and precise RUL predictions;
  - A Bi-directional Gated Recurrent Unit with a Multi-Head Attention mechanism for capturing input sequence information;
  - An MLP-Mixer Module Allows Communication with Learned Features in Time and Channel Direction;
  - An ensemble predictor based on the Mixture of Expert architecture is devised to determine the RUL value.

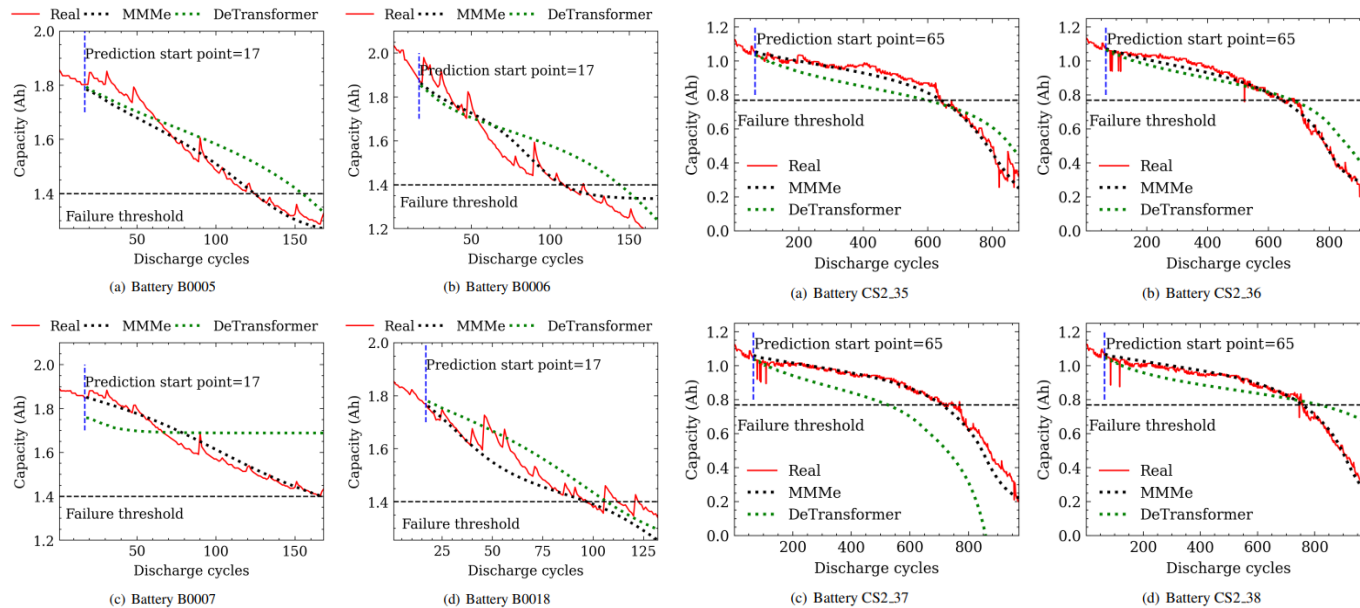

Plot of experimental results for the public dataset. Left: the NASA dataset ;Right: the CALCE dataset.
